# Supplementary material for: Activation of neutral sphingomyelinase 2 by starvation induces cell-protective autophagy via an increase in Golgi-localized ceramide
Source: PubMed Central journal article supplement (PMC5986760; doi:10.1038/s41419-018-0709-4), 2018-06-04
Supplement: 41419_2018_709_MOESM5_ESM.pdf [file 41419_2018_709_MOESM5_ESM.pdf]

A

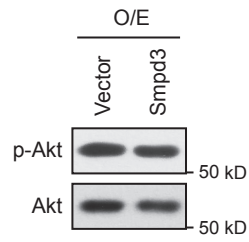

B

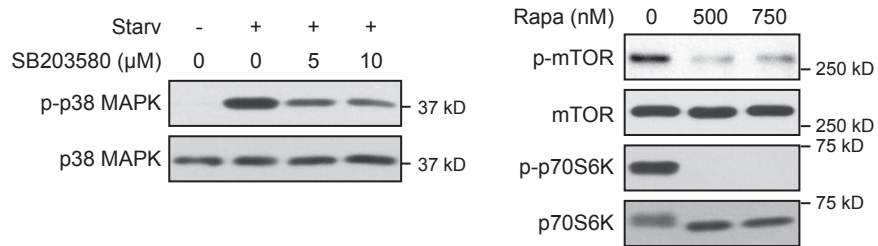

C

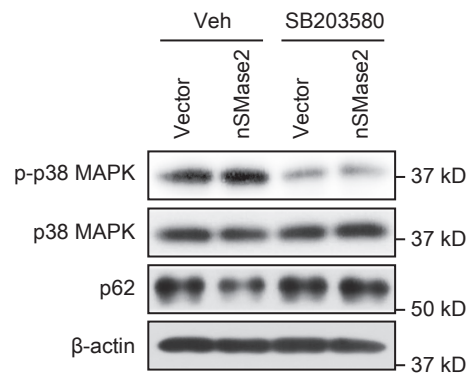

D

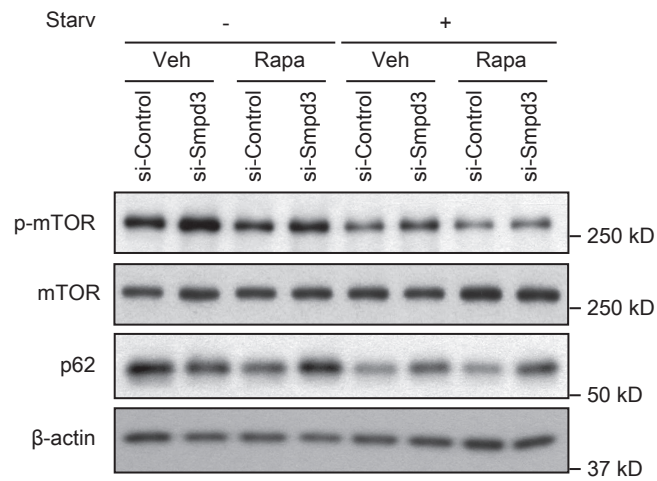

Figure S5
